# Supplementary material for: Identification of pyroptosis-related signature for cervical cancer predicting prognosis
Source: Aging (Albany NY). 2021 Nov 27;13(22):24795–814. doi: 10.18632/aging.203716 (PMC8660613; doi:10.18632/aging.203716)
Supplement: Supplementary Figures [file aging-13-203716-s001.pdf]

## SUPPLEMENTARY FIGURES

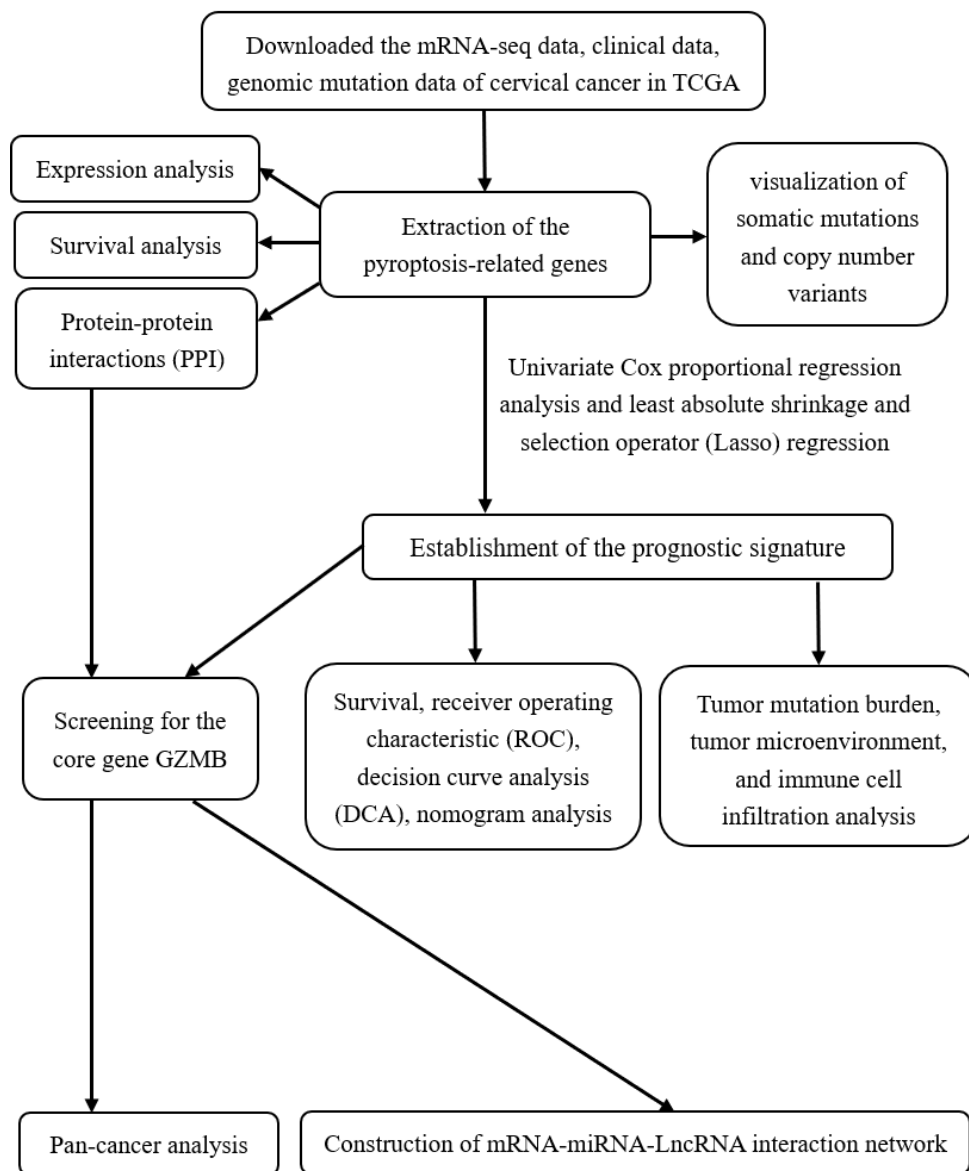

Supplementary Figure 1. Study flow diagram.

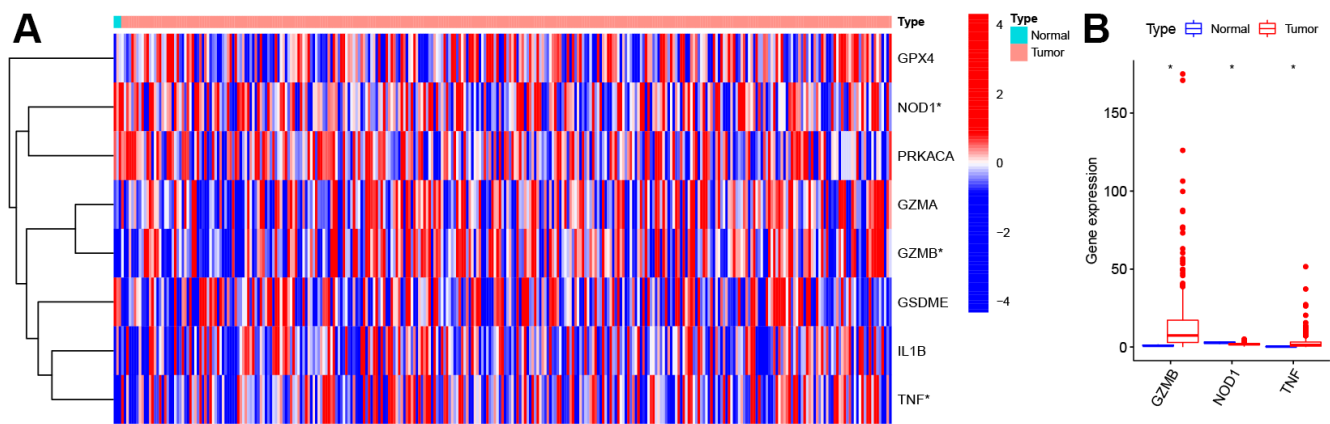

**Supplementary Figure 2. Prognostic pyroptosis-related genes.** (A) Heatmap. (B) Boxplot. Compared to normal cervical tissues, GZMB and TNF are highly expressed in cervical cancer tissues, while NOD1 is lowly expressed. \* $p < 0.05$ , \*\* $p < 0.01$ , and \*\*\* $p < 0.001$ .

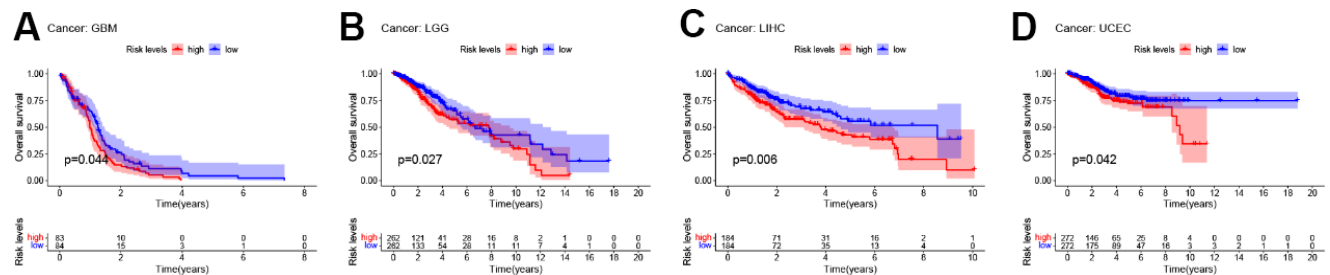

**Supplementary Figure 3. The pyroptosis-related signature in other tumors.** Kaplan-Meier curves showed lower overall survival rates in the high-risk group than in the low-risk group in GBM (A), LGG (B), LIHC (C), and UCEC (D) ( $P < 0.05$ ). GBM, Glioblastoma multiforme. LGG, Brain Lower Grade Glioma. LIHC, Liver hepatocellular carcinoma. UCEC, Uterine Corpus Endometrial Carcinoma.

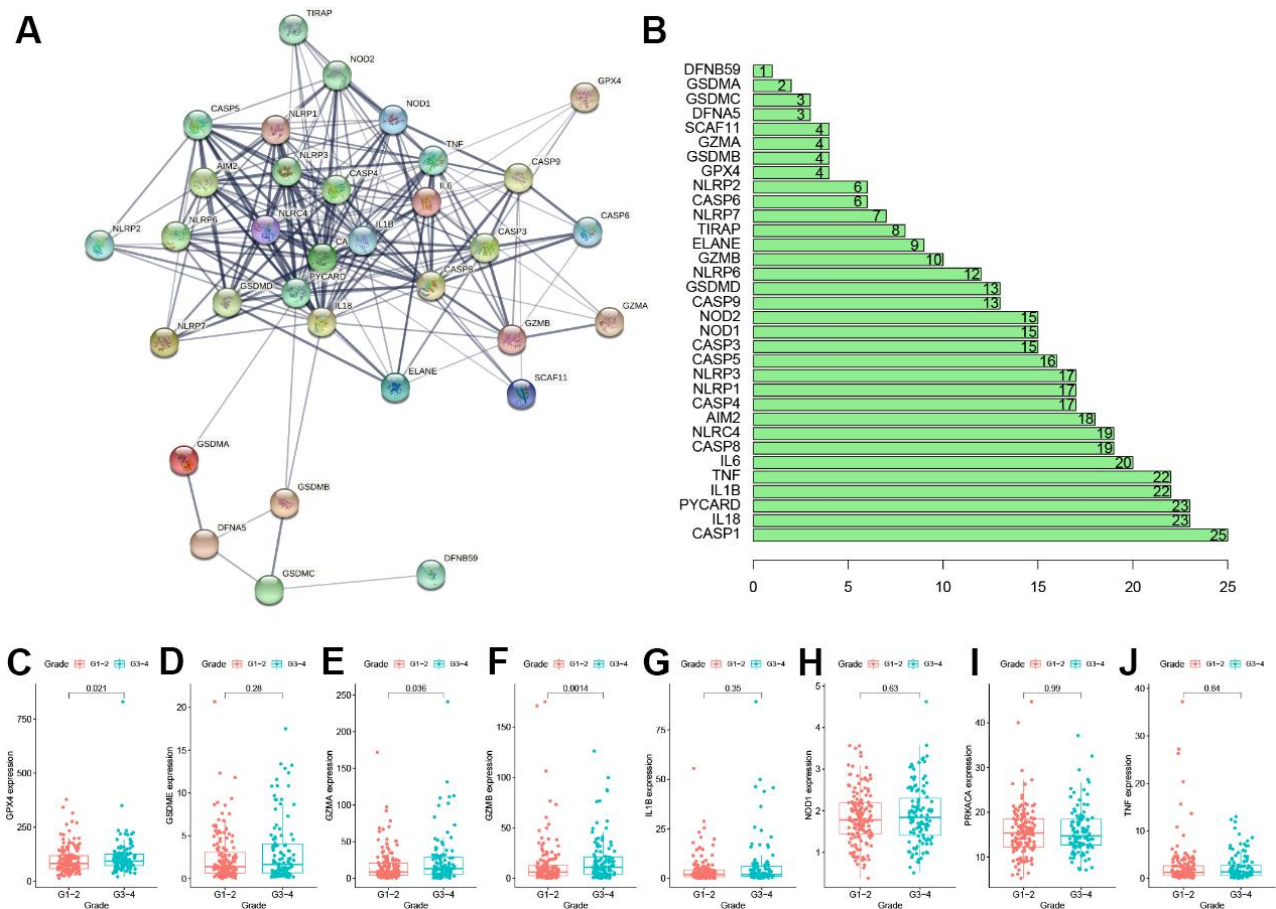

**Supplementary Figure 4. Identify the core gene of the pyroptosis-related signature.** (A) PPI network of the PRGs. (B) The degree of binding of PRGs. (C–J) Correlation of genes of the pyroptosis-related signature with the clinical feature Grade. The expression of GPX4, GZMA, and GZMB was significantly higher in the G3–4 group. PRGs, Pyroptosis-related genes.
